# Supplementary material for: Perylene-based molecular device: multifunctional spintronic and spin caloritronic applications
Source: Royal Society of Chemistry journal article supplement (doi:10.1039/d2cp05926f), 2023-01-01
Supplement: d2cp05926f1.pdf [file d2cp05926f1.pdf]

## Supplementary Material

### Perylene-based molecular device: Multifunctional spintronic and spin caloritronic applications

Xuming Wu,<sup>a,b</sup> Shifa Xiao,<sup>a</sup> Jun Quan,<sup>a</sup> Chunhua Tian<sup>\*a</sup> and Guoying Gao<sup>\*b</sup>

<sup>a</sup>College of Physical Science and Technology, Lingnan Normal University, 524048 Zhanjiang, China. E-mail: chunhuatian@lingnan.edu.cn

<sup>b</sup>School of Physics and Wuhan National High Magnetic Field Center, Huazhong University of Science and Technology, Wuhan 430074, China. E-mail: guoying\_gao@mail.hust.edu.cn

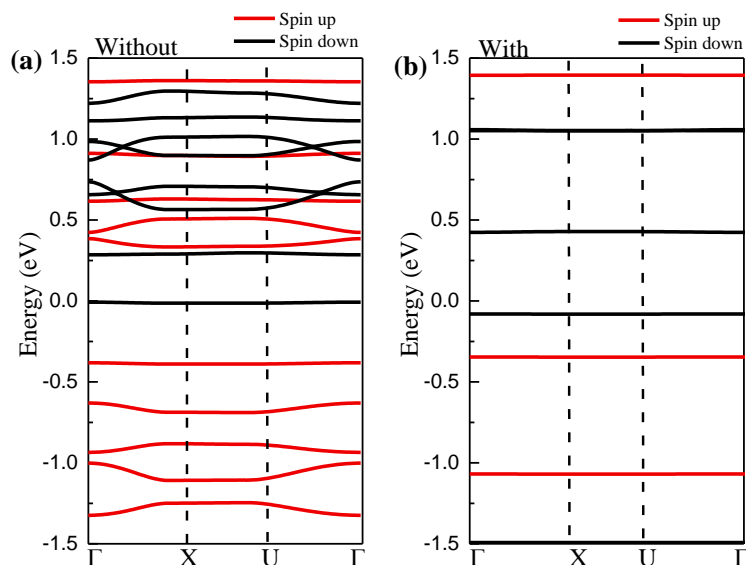

**Fig. S1** The spin-dependent band structure of the perylene molecule without (a) and with (b) hydrogenation.

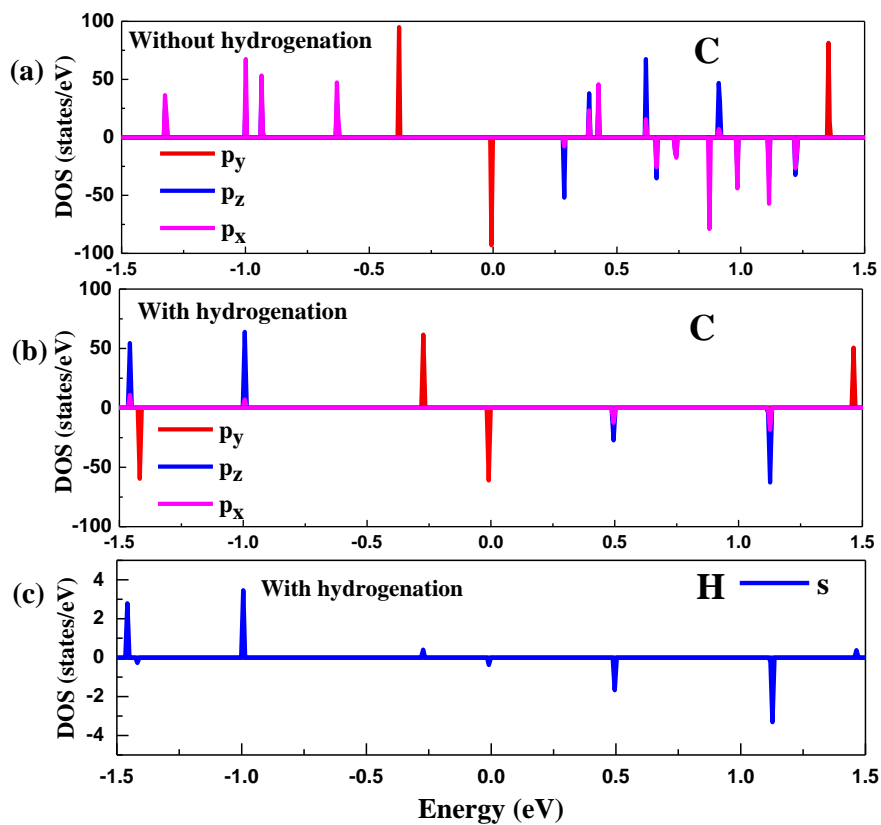

**Fig. S2** The spin-dependent main atomic orbital density of states of the perylene molecule without (a) and with (b,c) hydrogenation.

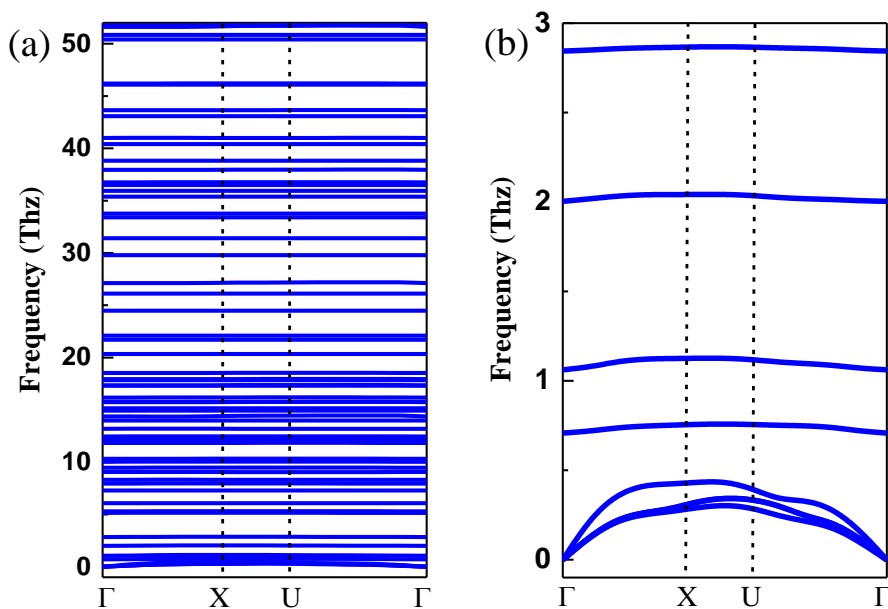

**Fig. S3** The phonon spectrum of the perylene molecule, which is presented in a smaller frequency range (b) in order to indicate whether there is imaginary frequency.

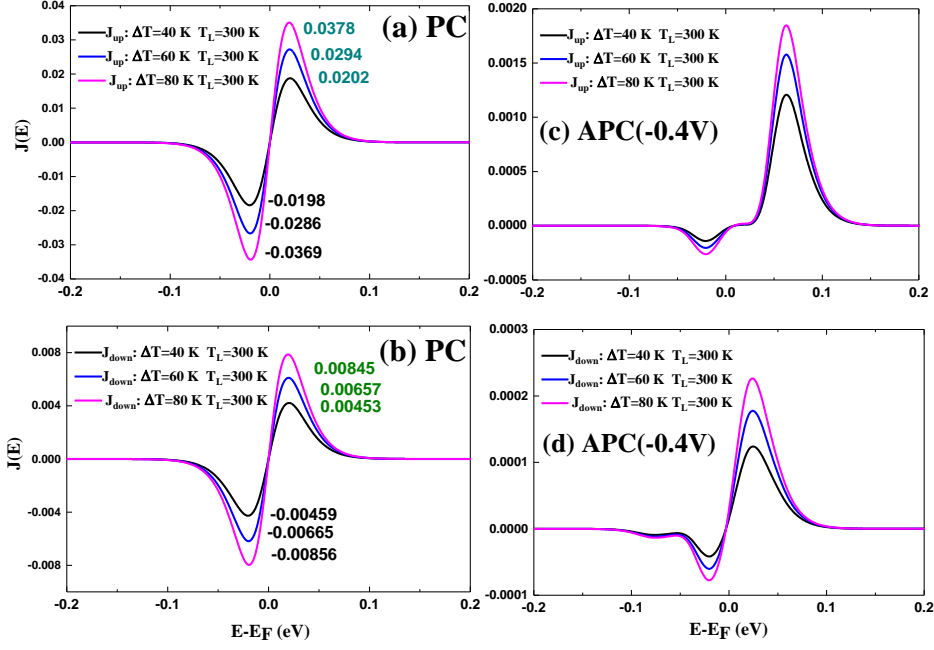

**Fig. S4** The spin-up (a) and spin-down (b) Fermi-Dirac distribution differences at  $\Delta T = 40, 60$  and  $80$  K as a function of energy in PC at  $T_L=300$  K, (c) and (d) are the same as (a) and (b) but in APC.

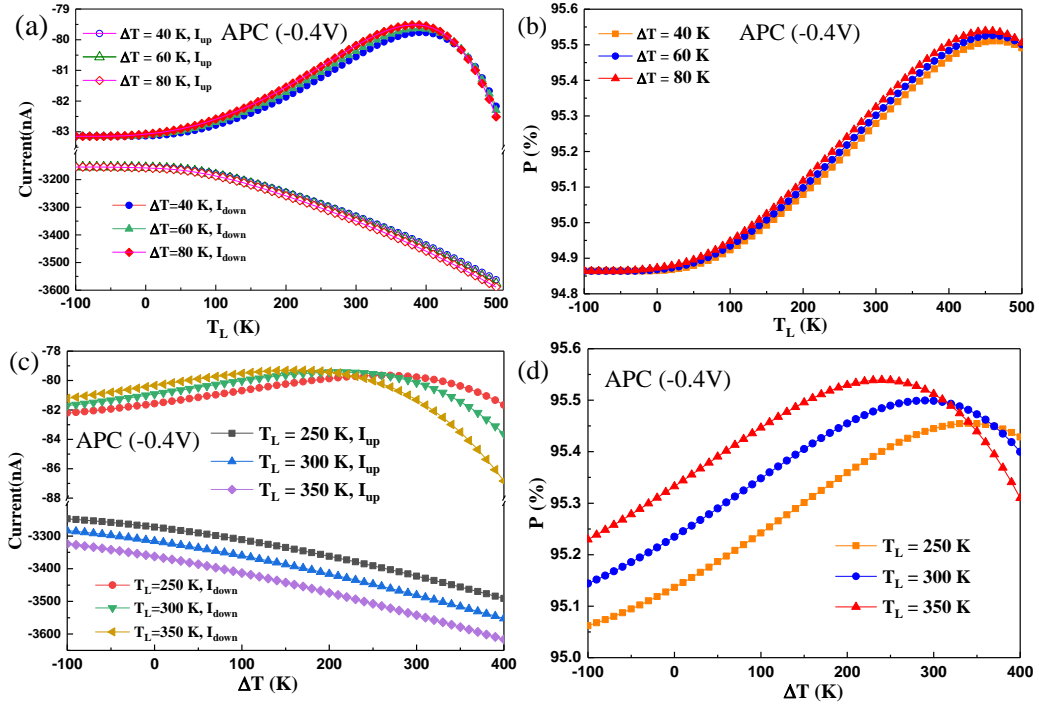

**Fig. S5** The thermal spin-dependent current versus  $T_L$  for different  $\Delta T$  (a) and versus  $\Delta T$  for different  $T_L$  (c) in APC at the bias voltage of  $-0.4$  V. The corresponding polarization of thermal spin current versus  $T_L$  for different  $\Delta T$  (b) and versus  $\Delta T$  for different  $T_L$  (d).
